# Supplementary material for: A high transmission axial ion mobility classifier for mass-mobility measurements of atmospheric ions
Source: Copernicus journal article supplement (doi:10.5194/amt-2022-29), 2022-03-04
Supplement: Supplementary file [file amt-2022-29-AC2-supplement.pdf]

## ***Author's Comments on “A high transmission axial ion mobility classifier for mass-mobility measurements of atmospheric ions” by Leiminger et al. – amt-2022-29***

We thank Reviewer #2 for the comments and suggestions, which helped to improve the manuscript. In the following, we present our reply. The reviewer's comments (RC) are marked in *italic*, our replies (AC: author comment) follow in roman and the improved manuscript text is shown in blue.

### **Response to Reviewer #2:**

#### **Specific comments:**

(RC 2-x: reviewer #2 - comment x)

*RC 2-1: Page 1, Line 22 and Page 11, Line 379: In Abstract and Conclusions, the authors used “sub 3 nm”, but in the text it is just written that cluster ions of 1 to 4 nm were formed (Page 4, Line 137). Did the authors explain that the improvement of the size resolution was achieved only in the sub 3 nm range in the text? The size of THAB monomer is written to be 1.48 nm (Page 8, Line 287). I think that it is better to show the size of THAB dimer, THAB trimer, THAB pentamer, and TPPAI monomer if possible.*

AC 2-1: We thank reviewer #2 for his comment. We did not intend to confuse any reader and hope to clarify this remark with the following answers. 1) We used the expression “sub 3 nm” to provide the reader with details how to relate this work with others. 2) We did not observe any obvious relation between size and resolution. 3) In Line 137 we wrote: “*enabling the precise formation of cluster ions of 1 to 4 nm as previously shown in (Brilke et al., 2020)*“. With this statement, we only wanted to make the reader aware that the bipolar electrospray that we used, has recently been demonstrated to generate ions in the 1 to 4 nm range. To make the point clearer, we updated the following sentence and added the details about the size of the used standard mobility ions as suggested by the reviewer.

Line 135: *Brilke et al., 2020, recently demonstrated that the benefit of using a bipolar ESI is that charged droplets of opposite polarity can be generated leading to a favourable reduction of multiple charged ions enabling the precise formation of cluster ions of 1 to 4 nm (Brilke et al., 2020).*

Line 146: *With the UDMA, we selected well-defined cluster ions. These were the TPPAI monomer as well as the THAB monomer, dimer, trimer and pentamer with mobility diameters of 1.16 nm, 1.48 nm, 1.78 nm, 1.97 nm, and 2.26 nm, respectively.*

*RC 2-2: Page 5, Lines 152-153: It is written that the blower was set to voltages from 0 to 5 V in 1 V step. This might mean that there are 6 different conditions. But in the previous sentence, it is written*

*that the calibration was carried out in 5 different blower settings. Are these two sentences consistent each other?*

AC 2-2: We thank the reviewer #2 for pointing to this inconsistency. While answering to reviewer #1's question *RC 1-1* in AC 1-1, we also explained the reason behind the difference between 6 available logical conditions and the 5 blower settings.

*RC 2-3: Page 6, Line 187: What is CFD the abbreviation of?*

AC 2-3: We thank the reviewer for this remark. We added the full title, please see below.

#### Computational fluid dynamics (CFD) simulations

*RC 2-4: Part1) Page 6, Lines 210-211: I couldn't understand the sentence "At a medium sheath flow setting of 55 L/min the impact of aerosol flow rate becomes clear comparing the flow profiles for aerosol flows of 5 and 10 L/min". What became clear?*

AC 2-4: We agree that the statement can be improved for better readability.

A comparison of the different aerosol flows of 5 and 10 L/min indicates how much the flow profile deviates from the desired plug flow profile for a fixed sheath flow rate.

*RC 2-4: Part 2) What is the value of Qsh at the medium sheath flow setting of 55 L/min? I supposed that it was 30 L/min of Qsh because the profile shown in the lower panel of Figure 4 was obtained with 10 L/min sample and 55 L/min sheath flow. But I might be wrong from the caption of Figure 6. If the value of Qsh at the medium sheath flow setting of 55 L/min is 10 L/min, is the lower panel of Figure 4 consist with the results of the upper panel of Figure 4? I was confused.*

AC 2-4: We understand the confusion about Qsh. We would like to point out that the Qsh values shown in the legend of Figure 4 differ from the one in the discussion about Fig. 6. We now also realized that the values for Qsh are not in line with the values given in the caption of Fig. 6. To improve the consistency of the manuscript, we propose to update Figure 4: we remove the flow profiles of flow rates that are not used in later parts of the manuscript that could lead to confusion (lines with Qsh = 10 and 30 L/min, see in the legend). On the other hand, we would like to add the flow profile of the "maximum" flow rate setting which is discussed in the main text but missing in the figure. The lower panel of Figure 4 remains unchanged.

*RC 2-5: Page 7, Line 242: I cannot judge if it has a higher resolution at higher sheath flows or not. Did the authors calculate the resolution according to eqn. (3)? Or is the resolution derived from eqn. (3) determined mainly from  $z_{1/2}$ ?*

AC 2-5: The resolution was calculated using equation (3) for every single ion at all tested flow settings. As we used ion mobility standards (Ude and De La Mora, 2005), we defined  $Z_{1/2}$  being equal to the mobility of the tested ion e.g.,  $Z_{1/2} = Z(\text{THA}^+) = 0.97 \text{ cm}^2/\text{Vs}$ . The full width at half maximum of

$Z_{1/2}$ , which is  $\Delta Z$ , was determined using the derivative of a sigmoid fit as described in section 3.2.1. As stated earlier in the reply to reviewer #2's comment, RC 1-5, we will update Figure 5 to improve the understanding how we determined the resolution. That the resolution generally is higher at higher sheath flows can be taken by the increase in ratio  $Q_{sh}/Q_{ae}$  with fixed  $Q_{ae}$  in Fig. 7 panels D, E and F.

RC 2-6: Page 7, Lines 250-251: I felt that the phrase "the previous discussion" here is ambiguous.

AC 2-6: We thank the reviewer for his suggestion and removed the phrase.

This effect cannot be ruled out completely, but it seems to be less likely.

RC 2-7: Page 8, Line 267: Define "U". Probably it is the same as "AMC voltage" in Figs. 5 and 6.

AC 2-7: The reviewer is correct, "U" is the same as "AMC voltage". We defined the expression in the main text.

With U as the voltage applied to the AMC electrode, the corrected ratio of  $N_{FCE2(U=0V)}$  to  $N_{FCE1}$  yields the transmission efficiency for a single setting.

RC 2-8: Page 8, Line 286: In Figs. 5 and 6, the values of the y-axis at AMC voltage  $\approx 0$  are almost 1 because they are "relative" values. If the authors plot these figures with the absolute transmission efficiency in the y-axis, are values at zero AMC voltage close to 0.7? If so, this information should be better to be mentioned when the authors explain Figure 5.

AC 2-8: Yes, if we plot both figures with the absolute transmission efficiency on the y-axis, the values are close to 0.7 for an AMC voltage of zero. We will add the absolute values on a second y-axis on the right in Fig. 5 to give the reader an example and will mention it in the caption.

Line 442: The absolute transmission efficiency is given on the right y-axis.

Line 223: How this affects the absolute transmission can be taken from the right y-axis.

In Fig. 6, we preferentially used the relative transmission for reasons of clarity. We added this statement in the caption of Fig. 6.

For reasons of visibility, we only show the relative transmission, "fraction"; and not the absolute transmission efficiency.

RC 2-9: Page 8, Line 290: I couldn't understand how the authors derived the value of "48.6%". In which figure does it show?

AC 2-9: The transmission of 48.6 % can be found in Fig. 7B for the THAB monomer,  $THA^+$ , at a  $Q_{sh}/Q_{ae}$  of about 10. In line 286, we describe in two sentences how we derived the value.

Line 290: In this case, see Fig. 7B, the AMC offers a transmission of 48.6 % when no voltage is applied.

RC 2-10: Page 8, Line 293: In the text (also in Line 273), the ratio  $Q_{total}/Q_{ac}$  is mentioned. However, the x-axis of Figure 7 is  $Q_{sh}/Q_{ac}$ . Is it ok?

AC 2-10: We thank the reviewer for making us aware of this inconsistency. The ratio of  $Q_{sh}/Q_{ae}$  as given in Fig. 7 is correct while it is not correct in the main text. We corrected this accordingly. In section 3.2.3:  $Q_{total}/Q_{ae}$  was replaced by  $Q_{sh}/Q_{ae}$  in the main text.

RC 2-11: Page 10, Line 341: The results shown in this section are very interesting and valuable. I would like to know the background level of this system.

AC 2-11: We appreciate the reviewer's interest. The background level of the used mass spectrometer is about  $0.00025 \text{ cm}^{-3}$  for 1 h integration time over a mass range up to 900 amu.

### Technical comments:

(Tx: technical comment x )

RC 2-T1: Page 1, Line 21: I could not find "Surawaski et al., 2017" in References.

AC 2-T1: We added "Surawaski et al. 2017" to the list.

Surawaski, N. C., Bezantakos, S., Barmounis, K., Dallaston, M. C., Schmidt-Ott, A., and Biskos, G.: A tunable high-pass filter for simple and inexpensive size-segregation of sub-10-nm nanoparticles, *Sci. Rep.*, 7, 1–8, <https://doi.org/10.1038/srep45678>, 2017.

RC 2-T2: Page 4, Line 129: I could not find "Fu et al., 2019" in References.

AC 2-T2: We added this reference to the list.

Fu, Y., Xue, M., Cai, R., Kangasluoma, J., and Jiang, J.: Theoretical and experimental analysis of the core sampling method: Reducing diffusional losses in aerosol sampling line, *Aerosol Sci. Technol.*, 53, 793–801, <https://doi.org/10.1080/02786826.2019.1608354>, 2019.

RC 2-T3: Page 5, Line 155: I could not find "Leiminger et al., 2019" in References.

AC 2-T3: We added it to the list.

Leiminger, M., Feil, S., Mutschlechner, P., Ylisirniö, A., Gunsch, D., Fischer, L., Jordan, A., Schobesberger, S., Hansel, A., and Steiner, G.: Characterisation of the transfer of cluster ions through an atmospheric pressure interface time-of-flight mass spectrometer with hexapole ion guides, *Atmos. Meas. Tech.*, 12, 5231–5246, <https://doi.org/10.5194/amt-12-5231-2019>, 2019.

RC 2-T4: Page 7, Line 257: Fig. 5 → Fig. 6

AC 2-T4: We agree. We corrected it in the main text.

Line 257: Fig. 6 panels C and D.

RC 2-T5: Page 8, Line 281: *Surawaski et al.* → *Surawski et al.*, 2017. *Is it correct?*

AC T5: We are sorry, but we cannot find the expression “Surawaski et al.”. It appears to be correct in the original submission.

RC 2-T6: Page 9, Line 310: *I could not find “Tammet, 2015” in References.*

AC 2-T6: We added this reference.

Tammet, H.: Passage of charged particles through segmented axial-field tubes, *Aerosol Sci. Technol.*, 49, 220–228, <https://doi.org/10.1080/02786826.2015.1018986>, 2015.

RC 2-T7: Page 10, Line 342: *It is better to mention Fig. 3B here.*

AC 2-T7: We agree. This improves the understanding.

Mass-mobility measurements of atmospheric ions are presented in Fig. 9. In this experiment, we used the setup depicted in Fig. 3B with the AMC coupled to inlet of the ioniAPi-TOF.

RC 2-T8: Page 10, Lines 362 and 368: “+” *should be a superscript.*

AC 2-T8: We agree with the reviewer. We corrected the expression in the main text.

Line 362:  $C_6H_{15}N \cdot H^+$ , Line 368:  $C_{12}H_{27}N \cdot H^+$ ,

RC 2-T9: Page 19, Line 549: “Hideki Kambara” → “Kambara H.” *and move it to the correct position.*

AC 2-T9: We thank the reviewer for this detail and corrected it accordingly.

Kambara, H., Mitsui, Y., and Kanomata, I.: Mass spectrometric study of ions produced in oxygen at atmospheric pressure by a collisional dissociation method, *Int. J. Mass Spectrom. Ion Phys.*, 35, 59–72, 1980.

RC 2-T10: Page S-2 of the Supplementary material, Line 17: *I think that the explanation “the sheath flow is set to zero in the first row and increases from the second to the last row” is wrong. The results of different ions are shown in the different rows.*

AC 2-T10: The reviewer is correct. We corrected the sentence in the caption.

For each ion, the AMC voltage is scanned for different sheath flow settings (off: 0 L/min, medium: 50 L/min, high: 70 L/min, very high: 85 L/min, maximum: 105 L/min).

RC 2-T11: Page S-2 of the Supplementary material, Line 24: *A Germany sentence is inserted.*

AC 2-T11: We corrected the sentence.

In linear scale, the slope in the carried-out AMC scan of THAB monomer resembles the slopes in Figure 6 and Figure S4.

RC 2-T12: *Page S-3 of the Supplementary material, Line 36: Show Brilke et al. (2019) in Reference of the Supplementary material.*

AC 2-T12: As suggested by the reviewer, we added the reference on the last page of the supplementary material.

Brilke, S., Resch, J., Leiminger, M., Steiner, G., Tauber, C., Wlasits, P. J., and Winkler, P. M.: Precision characterization of three ultrafine condensation particle counters using singly charged salt clusters in the 1–4 nm size range generated by a bipolar electrospray source, *Aerosol Sci. Technol.*, 0, 1–14, <https://doi.org/10.1080/02786826.2019.1708260>, 2020.
